# Supplementary material for: Social Stigma and Depression among Asymptomatic COVID-19 Carriers in Shanghai, China: The Mediating Role of Entrapment and Decadence
Source: MDPI journal article supplement (doi:10.3390/ijerph192013006), 2022-10-11
Supplement: s1 [file s1]

## Supplement

### I. Psychometrics

Participants were randomly divided into two groups based on a random number generator to be used to perform exploratory factor analysis (EFA;  $n = 628$ ) and confirmatory factor analysis (CFA;  $n = 655$ ), respectively, to evaluate the construct validity of the Social Impact Scale (SIS), Entrapment Scale (ES), and Defeat Scale (DS).

#### 1. Social Impact Scale (SIS)

Construct validity

EFA was performed using data of the first group using IBM SPSS Statistics 26.0 (IBM Corp., Armonk, NY, USA). Principal component analysis with covariance matrix, eigenvalues greater than 1 and varimax rotation was used. Results of Kaiser-Meyer-Olkin (KMO) Test (KMO measure of sampling adequacy = 0.967) and Bartlett's Test of Sphericity ( $\chi^2 = 14072.922, p < 0.001$ ) indicated that the data were suitable for factor analysis. Four common factors were extracted, which accounted for 69.613% of the variance. Detailed information on factor loading of two subscales used in this study was shown in Supp Table 1.

**Supp Table S1.** Factor loading of the Chinese version of the two subscale of Social

Impact Scale (SIS) ( $n = 628$ )

| No | Item                                                                         | Factor Loading |
|----|------------------------------------------------------------------------------|----------------|
| 1  | My employer / co-workers have discriminated against me because of my illness | 0.530          |

---

|    |                                                                                                                      |       |
|----|----------------------------------------------------------------------------------------------------------------------|-------|
| 2  | Some people act as though I am less competent than usual                                                             | 0.526 |
| 3  | I feel I have been treated with less respect than usual by others                                                    | 0.616 |
| 4  | I feel others are concerned they could “catch” my illness through contact like a handshake or eating food I prepare. | 0.640 |
| 5  | I feel others avoid me because of my illness                                                                         | 0.719 |
| 6  | Some family members have rejected me because of my illness                                                           | 0.662 |
| 7  | I feel some friends have rejected me because of my illness                                                           | 0.707 |
| 8  | I encounter embarrassing situations as a result of my illness.                                                       | 0.652 |
| 9  | Due to my illness others seem to feel awkward and tense when they are around me                                      | 0.682 |
| 10 | I feel set apart from others who are well                                                                            | 0.616 |
| 11 | I have a greater need than usual for reassurance that others care about me                                           | 0.418 |
| 12 | I feel lonely more often than usual                                                                                  | 0.551 |
| 13 | Due to my illness, I have a sense of being unequal in my relationships with others                                   | 0.591 |

---

|    |                                                    |       |
|----|----------------------------------------------------|-------|
| 14 | I feel less competent than I did before my illness | 0.802 |
| 15 | Due to my illness, I sometimes feel useless        | 0.817 |
| 16 | The illness have affected my social relationships. | 0.647 |

Data of the second group were used to perform a CFA using Mplus Version 8.3 (Muthen & Muthen, Los Angeles, CA, U.S.).  $\chi^2 = 1469.127$ ,  $DF = 246$ ,  $\chi^2/DF = 5.972$ ,  $RMSEA = 0.088$ ,  $CFI = 0.909$ ,  $TLI = 0.898$ ,  $SRMR = 0.056$ . These model fit indices of the four-dimensional model suggested that the construct of the questionnaire was acceptable. Detailed regression coefficients of each used item were shown in Supp Table 2.

**Supp Table S2.** Confirmatory factor analysis parameter estimation of the two subscale of SIS (n = 655)

| No | Estimate | Standard error | z value |
|----|----------|----------------|---------|
| 1  | 0.511    | 0.026          | 19.443* |
| 2  | 0.559    | 0.025          | 22.389* |
| 3  | 0.596    | 0.024          | 24.547* |
| 4  | 0.697    | 0.030          | 23.555* |
| 5  | 0.745    | 0.028          | 26.223* |
| 6  | 0.618    | 0.025          | 24.480* |
| 7  | 0.700    | 0.025          | 27.718* |
| 8  | 0.711    | 0.028          | 25.399* |
| 9  | 0.735    | 0.029          | 25.192* |

|    |       |       |         |
|----|-------|-------|---------|
| 10 | 0.575 | 0.025 | 23.127* |
| 11 | 0.607 | 0.031 | 19.695* |
| 12 | 0.643 | 0.024 | 27.066* |
| 13 | 0.651 | 0.025 | 26.503* |
| 14 | 0.651 | 0.024 | 27.625* |
| 15 | 0.641 | 0.023 | 27.883* |
| 16 | 0.707 | 0.026 | 26.740* |

\* $p < 0.001$

## Reliability

Cronbach's  $\alpha$  was calculated to evaluate the internal consistency reliability and was 0.967. Split-half reliability was determined by Spearman-Brown coefficient, which was 0.975. These two coefficients were calculated using IBM SPSS Statistics 26.0 (IBM Corp., Armonk, NY, USA).

## 2. Entrapment Scale (ES)

The analysis method is similar to that of SIS. Results are shown in Supp Table 3 and Supp Table S4.

**Supp Table S3.** Validity and reliability of the ES

| Indices                     | Value |
|-----------------------------|-------|
| <b>Construct validity</b>   |       |
| Exploratory factor analysis |       |

|                                                         |                                 |
|---------------------------------------------------------|---------------------------------|
| KMO measure of sampling adequacy                        | 0.969                           |
| Bartlett's Test of Sphericity                           | $\chi^2 = 11681.917, p < 0.001$ |
| total variance explained                                | 73.489%                         |
| Factor loading of the Chinese version of the 16-item ES | 0.785 – 0.904                   |
| Confirmatory factor analysis                            |                                 |
| $\chi^2/DF$                                             | 11.76                           |
| CFI                                                     | 0.898                           |
| SRMR                                                    | 0.040                           |
| <b>Reliability</b>                                      |                                 |
| Cronbach's $\alpha$                                     | 0.973                           |
| Spearman-Brown coefficient                              | 0.976                           |

---

**Supp Table S4.** Confirmatory factor analysis parameter estimation of entrapment (n = 655)

| No | Estimate | Standard error | z value  |
|----|----------|----------------|----------|
| 1  | 0.679    | 0.022          | 31.334*  |
| 2  | 0.843    | 0.012          | 70.529*  |
| 3  | 0.774    | 0.016          | 47.574*  |
| 4  | 0.883    | 0.009          | 95.603*  |
| 5  | 0.804    | 0.014          | 55.612 * |
| 6  | 0.798    | 0.015          | 53.789*  |
| 7  | 0.819    | 0.013          | 60.741*  |

|    |       |       |         |
|----|-------|-------|---------|
| 8  | 0.745 | 0.018 | 41.462* |
| 9  | 0.804 | 0.014 | 55.797* |
| 10 | 0.826 | 0.013 | 63.578* |
| 11 | 0.829 | 0.013 | 64.685* |
| 12 | 0.857 | 0.011 | 78.258* |
| 13 | 0.884 | 0.009 | 95.675* |
| 14 | 0.883 | 0.009 | 95.009* |
| 15 | 0.826 | 0.013 | 63.312* |
| 16 | 0.888 | 0.009 | 99.669* |

\* $p < 0.001$

### 3. Defeat Scale (DS)

The analysis method is similar to that of SIS. Results are shown in Supp Tables S5 and S6.

**Supp Table S5.** Validity and reliability of the DS

| Indices                                                 | Value                          |
|---------------------------------------------------------|--------------------------------|
| <b>Construct validity</b>                               |                                |
| Exploratory factor analysis                             |                                |
| KMO measure of sampling adequacy                        | 0.952                          |
| Bartlett's Test of Sphericity                           | $\chi^2 = 8621.107, p < 0.001$ |
| total variance explained                                | 70.969%                        |
| Factor loading of the Chinese version of the 16-item ES |                                |

|                              |             |
|------------------------------|-------------|
| decadence (13 items)         | 0.778-0.891 |
| low achievement (3 items)    | 0.744-0.892 |
| Confirmatory factor analysis |             |
| $\chi^2/DF$                  | 5.690       |
| CFI                          | 0.946       |
| SRMR                         | 0.034       |
| <b>Reliability</b>           |             |
| Cronbach's $\alpha$          | 0.904       |
| Spearman-Brown coefficient   | 0.923       |

---

**Supp Table S6.** Confirmatory factor analysis parameter estimation of decadence (n = 655)

| No | Estimate | Standard error | z value  |
|----|----------|----------------|----------|
| 1  | 0.724    | 0.019          | 37.620*  |
| 3  | 0.764    | 0.017          | 45.115*  |
| 5  | 0.801    | 0.015          | 54.374*  |
| 6  | 0.844    | 0.012          | 70.521*  |
| 7  | 0.864    | 0.011          | 80.805 * |
| 8  | 0.776    | 0.016          | 47.733*  |
| 10 | 0.736    | 0.019          | 39.648*  |
| 11 | 0.838    | 0.012          | 67.517*  |
| 12 | 0.874    | 0.010          | 87.391*  |

|    |       |       |         |
|----|-------|-------|---------|
| 13 | 0.878 | 0.010 | 90.020* |
| 14 | 0.864 | 0.011 | 81.062* |
| 15 | 0.873 | 0.010 | 86.698* |
| 16 | 0.852 | 0.011 | 74.271* |

\* $p < 0.001$

## II. Covariate Selection

**Supp Table S7.** A multivariate logistic regression model of depression

| variables                     | $\beta$ | SE    | Wals   | P      | OR    |
|-------------------------------|---------|-------|--------|--------|-------|
| Age                           | -.003   | 0.006 | 0.292  | 0.589  | 0.997 |
| Sex                           | 0.018   | 0.119 | 0.024  | 0.878  | 1.018 |
| Education level               | -0.568  | 0.136 | 17.420 | <0.001 | 0.567 |
| Marriage status               | -0.076  | 0.145 | 0.277  | 0.599  | 0.926 |
| Length of time from diagnosis | -0.050  | 0.085 | 0.346  | 0.556  | 0.951 |
| Doses of COVID-19 vaccines    | 0.145   | 0.072 | 4.128  | 0.042  | 1.157 |
| Stigma                        | 0.012   | 0.006 | 4.551  | 0.033  | 1.012 |

**Supp Table S8.** Logistic regression of depression with backward elimination / Change-

In-Estimate procedure

| variables                                | $\beta$ | SE    | Wals   | P      | OR    |
|------------------------------------------|---------|-------|--------|--------|-------|
| <b>Step 1 removal of age</b>             |         |       |        |        |       |
| Sex                                      | 0.015   | 0.118 | 0.017  | 0.896  | 1.016 |
| Education level                          | -0.555  | 0.134 | 17.176 | <0.001 | 0.574 |
| Marriage status                          | -0.115  | 0.126 | 0.836  | 0.361  | 0.891 |
| Length of time from diagnosis            | -0.051  | 0.085 | 0.361  | 0.548  | 0.950 |
| Doses of COVID-19 vaccines               | 0.144   | 0.071 | 4.035  | 0.045  | 1.154 |
| Stigma                                   | 0.012   | 0.006 | 4.538  | 0.033  | 1.012 |
| <b>Step 2 removal of sex</b>             |         |       |        |        |       |
| Age                                      | -0.003  | 0.006 | 0.285  | 0.593  | 0.997 |
| Education level                          | -0.564  | 0.134 | 17.823 | <0.001 | 0.569 |
| Marriage status                          | -0.075  | 0.145 | 0.266  | 0.606  | 0.928 |
| Length of time from diagnosis            | -0.050  | 0.085 | 0.342  | 0.559  | 0.951 |
| Doses of COVID-19 vaccines               | 0.145   | 0.072 | 4.123  | 0.042  | 1.156 |
| Stigma                                   | 0.012   | 0.006 | 4.594  | 0.032  | 1.012 |
| <b>Step 3 removal of marriage status</b> |         |       |        |        |       |

|                                                        |        |       |        |        |       |
|--------------------------------------------------------|--------|-------|--------|--------|-------|
| Age                                                    | -0.005 | 0.005 | 0.850  | 0.357  | 0.995 |
| Sex                                                    | 0.013  | 0.118 | 0.012  | 0.913  | 1.013 |
| Education level                                        | -0.559 | 0.135 | 17.173 | <0.001 | 0.572 |
| Length of time from diagnosis                          | -0.051 | 0.085 | 0.364  | 0.546  | 0.950 |
| Doses of COVID-19 vaccines                             | 0.142  | 0.071 | 3.967  | 0.046  | 1.152 |
| Stigma                                                 | 0.012  | 0.006 | 4.434  | 0.035  | 1.012 |
| <b>Step 4 removal of length of time from diagnosis</b> |        |       |        |        |       |
| Age                                                    | -0.003 | 0.006 | 0.307  | 0.580  | 0.997 |
| Sex                                                    | 0.017  | 0.118 | 0.020  | 0.888  | 1.017 |
| Education level                                        | -0.562 | 0.136 | 17.177 | <0.001 | 0.570 |
| Marriage status                                        | -0.079 | 0.145 | 0.295  | 0.587  | 0.924 |
| Doses of COVID-19 vaccines                             | 0.148  | 0.071 | 4.265  | 0.039  | 1.159 |
| Stigma                                                 | 0.012  | 0.006 | 4.668  | 0.031  | 1.012 |

Note: The change in OR of stigma in each step is calculated with respect to the OR=1.012 in the initial model (Supp Table 7)

### III. Temporal Validation

Data were randomized to training group and validation group in a 3:1 ratio. Then the bias-corrected percentile bootstrapping method was used for temporal validation.

**Supp Figure S1** The mediating role of entrapment and decadence in the relationship between stigma and depression in the training group (n = 985).

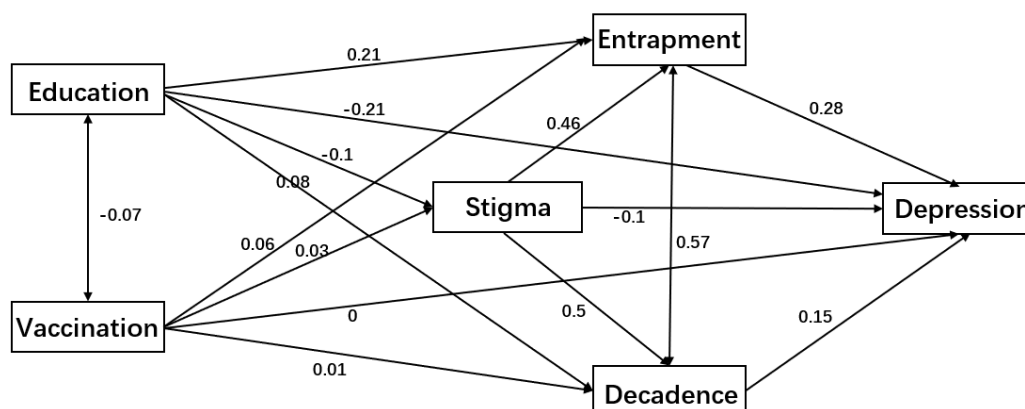

**Supp Table S9.** Parameter estimates for Mediation Analysis in the validation group (n = 298)

|                                | Point Estimate | Product of Coefficients |           |         | 95% Confidence Interval |       |
|--------------------------------|----------------|-------------------------|-----------|---------|-------------------------|-------|
|                                |                | S.E.                    | Est./S.E. | P value | Lower                   | Upper |
| Direct effects                 |                |                         |           |         |                         |       |
| Stigma→ Depression             | -0.101         | 0.048                   | -2.074    | 0.038   | -0.203                  | 0.005 |
| Indirect effects               |                |                         |           |         |                         |       |
| Stigma→ Entrapment→ Depression | 0.128          | 0.036                   | 3.594     | < 0.001 | 0.069                   | 0.197 |
| Stigma→ Decadence→ Depression  | 0.076          | 0.037                   | 2.043     | 0.041   | 0.008                   | 0.141 |
| Total effects                  |                |                         |           |         |                         |       |
| Stigma→ Depression             | 0.104          | 0.045                   | 2.309     | 0.021   | 0.004                   | 0.188 |
| Total indirect effects         |                |                         |           |         |                         |       |
| Stigma→ Depression             | 0.204          | 0.029                   | 6.951     | < 0.001 | 0.149                   | 0.259 |
| Residual covariances           |                |                         |           |         |                         |       |
| Entrapment ↔ Decadence         | 0.574          | 0.043                   | 13.360    | < 0.001 | 0.446                   | 0.722 |

Note: education level, doses of vaccine were controlled as covariates in the path analysis
